# Supplementary figures and images for: Physiological trade-offs in self-maintenance: plumage molt and stress physiology in birds
Source: Oxford University Press journal article supplement (doi:10.1242/jeb.057174), 2011-07-27

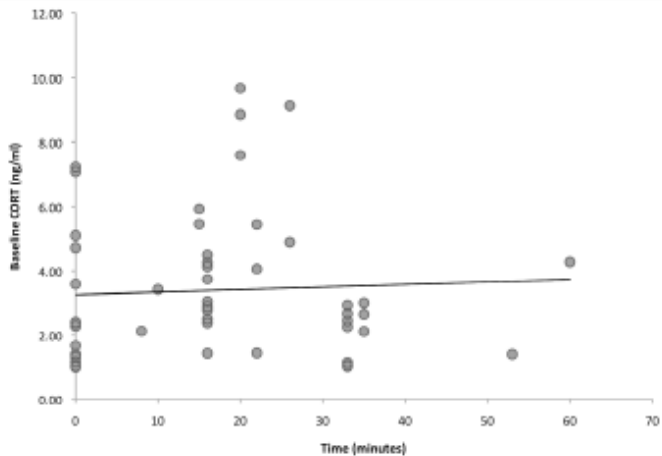

Supplement: jeb057174figs1.pdf [file jeb057174figs1.pdf]

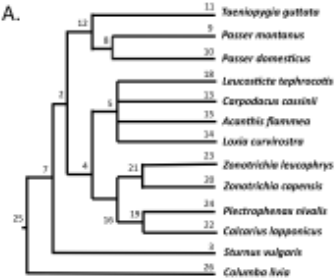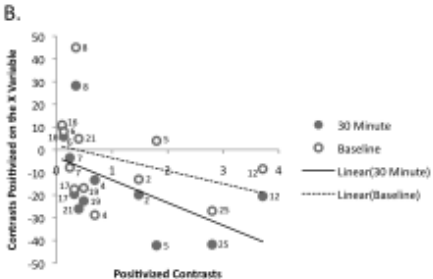

Supplement: jeb057174figs2.pdf [file jeb057174figs2.pdf]
